# Supplementary material
Source: PubMed Central journal article supplement (PMC3742072)
Supplement: NIHMS462426-supplement-1.pdf [file NIHMS462426-supplement-1.pdf]

**Table S1. Sequence Identity of Synapsins, Related to Figure 3**

|               | Mm Synapsin2 | Dr Synapsin1 | Dr Synapsin2a | Dr Synapsin2b |
|---------------|--------------|--------------|---------------|---------------|
| Mm Synapsin1  | 70.5         | 71.7         | 63.6          | 55.7          |
| Mm Synapsin2  |              | 65.9         | 67.1          | 60.8          |
| Dr Synapsin1  |              |              | 63.6          | 54.4          |
| Dr Synapsin2a |              |              |               | 63.5          |

A comparison of the actin and SV binding domains of mouse (Mm) and zebrafish (Dr)

Synapsins 1 and 2 demonstrates a high-level of amino acid sequence identity (in %) between orthologs.
